# Supplementary material
Source: PubMed Central journal article supplement (PMC7700914)

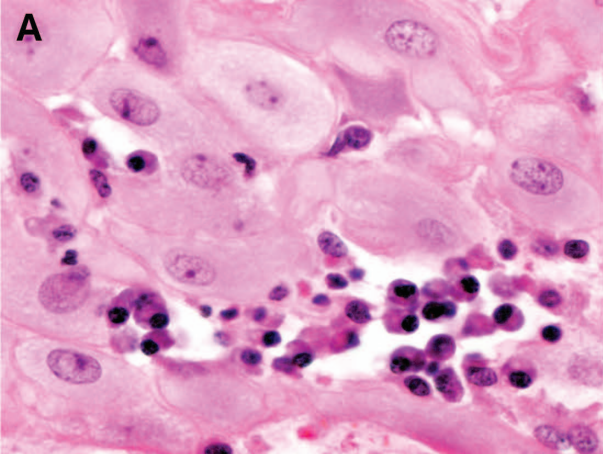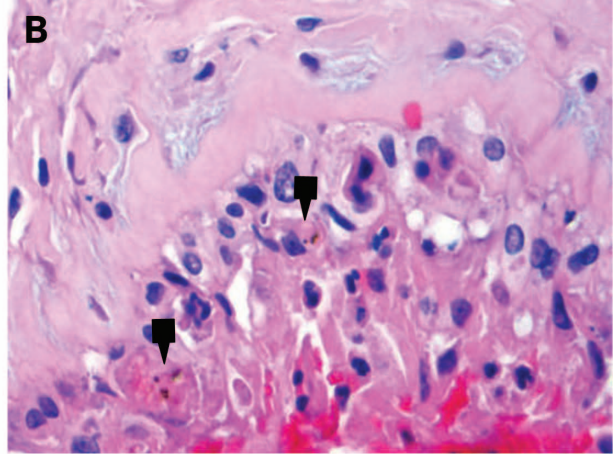

Supplement: 41372_2020_877_MOESM1_ESM.pdf [file 41372_2020_877_MOESM1_ESM.pdf]
